# Supplementary material
Source: Springer Nature journal article supplement (https://www.springermedizin.de/resource/supplementary/13052_2013_551_MOESM11_ESM.pdf/9672024)

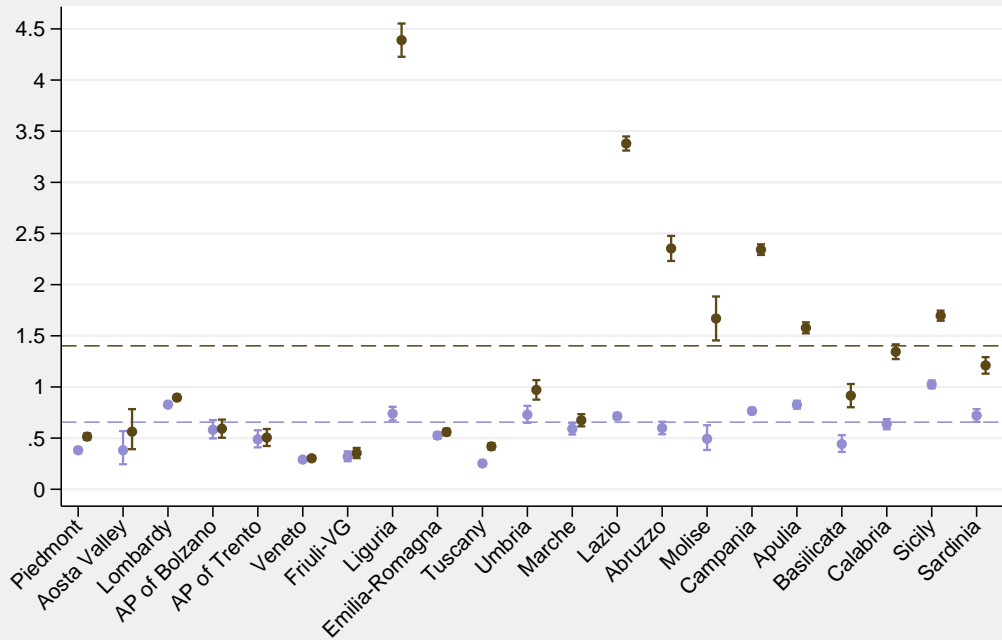

● Ordinary adm.
 ● Ordinary and day hospital adm.

Supplement: MOESM11 [file 9672024]
